# Supplementary material for: Evolutionary Relationships of Microbial Aromatic Prenyltransferases
Source: PubMed Central journal article supplement (PMC3227686; doi:10.1371/journal.pone.0027336), 2011-11-30
Supplement: pone.0027336.s001.pdf [file pone.0027336.s001.pdf]

## SUPPLEMENTAL DATA FOR

### Evolutionary Relationships of Microbial Aromatic Prenyltransferases

T. Bonitz, V. Alva, O. Saleh, A. N. Lupas, L. Heide

**Table S1: Proteins included in this study**

| Name                                                          | organism                                             | NCBI Accession      | Reference for biochemical data |
|---------------------------------------------------------------|------------------------------------------------------|---------------------|--------------------------------|
| <b>NphB/CloQ family (phenol/phenazine prenyltransferases)</b> |                                                      |                     |                                |
| CloQ*                                                         | <i>Streptomyces roseochromogenes subsp. oscitans</i> | AAN65239            | [1]                            |
| Fnq26*                                                        | <i>Streptomyces cinnamonensis</i>                    | CAL34104            | [2]                            |
| Fur7*                                                         | <i>Streptomyces</i> sp. KO-3988                      | BAE78975            | [3]                            |
| NphB*                                                         | <i>Streptomyces</i> sp. Strain CI190                 | 1ZB6_A              | [4]                            |
| NovQ*                                                         | <i>Streptomyces niveus</i> DSM 40088                 | AAF67510            | [5]                            |
| EpzP*                                                         | <i>Streptomyces cinnamonensis</i>                    | ADQ43372            | [6]                            |
| PpzP*                                                         | <i>Streptomyces anulatus</i>                         | CAX48655            | [7]                            |
| Ptf <sub>At</sub> *                                           | <i>Aspergillus terreus</i> NIH2624                   | EAU39467            | [8]                            |
| Ptf <sub>Bf</sub> *                                           | <i>Botryotinia fuckeliana</i> B05.10                 | EDN25735            |                                |
| Ptf <sub>Ss</sub> *                                           | <i>Sclerotinia sclerotiorum</i> 1980                 | EDN93598            |                                |
| SCO7190*                                                      | <i>Streptomyces coelicolor</i> A3(2)                 | NP_631248           | [9]                            |
| <b>DMATS/CymD family</b>                                      |                                                      |                     |                                |
| <b>a) fungal indole prenyltransferases</b>                    |                                                      |                     |                                |
| DmaW-Cp*                                                      | <i>Claviceps purpurea</i>                            | Q6X2E0              | [10]                           |
| DmaW-Cs*                                                      | <i>Clavicipitaceae</i> sp. US2005a                   | AAZ29613            | [11]                           |
| DmaW-Cf*                                                      | <i>Claviceps fusiformis</i>                          | AAC18893            | [12]                           |
| DmaW-Lp1*                                                     | <i>Epichloe typhina</i> x <i>Neotyphodium lolii</i>  | AAP81206            |                                |
| FgaPT1*                                                       | <i>Aspergillus fumigatus</i> Af293                   | XP_756136           | [13]                           |
| FgaPT2*                                                       | <i>Aspergillus fumigatus</i>                         | AAX08549/<br>3I4Z_A | [14]                           |
| FtmPT1*                                                       | <i>Aspergillus fumigatus</i>                         | AAX56314/<br>3O2K_A | [15]                           |
| FtmPT2*                                                       | <i>Aspergillus fumigatus</i>                         | ACF22981            | [16]                           |
| CdpNPT*                                                       | <i>Aspergillus fumigatus</i>                         | ABR14712            | [17]                           |
| AnaPT*                                                        | <i>Neosartorya fischeri</i> NRRL 181                 | EAW16181            | [18]                           |
| 7-DMATS*                                                      | <i>Aspergillus fumigatus</i>                         | ABS89001            | [19]                           |
| TdiB*                                                         | <i>Emericella nidulans</i>                           | ABU51603            | [20]                           |
| MaPT*                                                         | <i>Malbranchea aurantiaca</i> RRC1813                | ABZ80612            | [21]                           |
| NotC*                                                         | <i>Aspergillus</i> sp. MF297-2                       | ADM34131            | [22]                           |
| NotF*                                                         | <i>Aspergillus</i> sp. MF297-2                       | ADM34132            |                                |
| CpaD_Ao*                                                      | <i>Aspergillus oryzae</i> RIB40                      | XP_001821505        | [23]                           |
| CpaD_Af*                                                      | <i>Aspergillus flavus</i> NRRL3357                   | XP_002379958        |                                |

|                                                       |                                                 |               |      |
|-------------------------------------------------------|-------------------------------------------------|---------------|------|
| XptA*                                                 | <i>Aspergillus nidulans</i> FGSC A4             | XP_664388     | [24] |
| XptB*                                                 |                                                 | see reference |      |
| SirD*                                                 | <i>Leptosphaeria maculans</i>                   | AAS92554      | [25] |
| VrtC*                                                 | <i>Penicillium aethiopicum</i>                  | ADI24928      | [26] |
| <b>DMATS/CymD family</b>                              |                                                 |               |      |
| <b>b) bacterial indole prenyltransferases</b>         |                                                 |               |      |
| IptA* = 6-dimethylallyl-tryptophan synthase           | <i>Streptomyces</i> sp. SN-593                  | BAJ07990      | [27] |
| CymD* = Sare_4565                                     | <i>Salinispora arenicola</i> CNS-205            | YP_001539324  | [28] |
| LtxC*                                                 | <i>Lyngbya majuscula</i>                        | AAT12285      | [29] |
| SCO7467*                                              | <i>Streptomyces coelicolor</i> A3(2)            | NP_631515     | --   |
| <b>Prenyltransferases of lipoquinone biosynthesis</b> |                                                 |               |      |
| UbiA                                                  | <i>Escherichia coli</i> str. K-12 substr. W3110 | AP_004541     | [30] |
| MenA                                                  | <i>Escherichia coli</i>                         | AAB01207      | [31] |
| Slr1736                                               | <i>Synechocystis</i> sp. PCC 6803               | BAA17774      | [32] |
| UbiA                                                  | <i>Salinispora tropica</i> CNB-440              | YP_001160901  | --   |
| UbiA                                                  | <i>Salinispora tropica</i> CNB-440              | YP_001161073  | --   |
| UbiA                                                  | <i>Catenulispora acidiphila</i> DSM 44928       | YP_003118736  | --   |
| UbiA                                                  | <i>Catenulispora acidiphila</i> DSM 44928       | YP_003112865  | --   |
| UbiA                                                  | <i>Catenulispora acidiphila</i> DSM 44928       | YP_003115669  | --   |
| UbiA                                                  | <i>Catenulispora acidiphila</i> DSM 44928       | YP_003116365  | --   |

\* Used in HHpred analysis (Figure 3)

## REFERENCES

- Pojer F, Wemakor E, Kammerer B, Chen H, Walsh CT, et al. (2003) CloQ, a prenyltransferase involved in clorobiocin biosynthesis. *Proc Natl Acad Sci U S A* 100: 2316-2321.
- Haagen Y, Glück K, Fay K, Kammerer B, Gust B, et al. (2006) A gene cluster for prenylated naphthoquinone and prenylated phenazine biosynthesis in *Streptomyces cinnamonensis* DSM 1042. *Chembiochem* 7: 2016-2027.
- Kumano T, Tomita T, Nishiyama M, Kuzuyama T (2010) Functional characterization of the promiscuous prenyltransferase responsible for furaquinocin biosynthesis: identification of a physiological polyketide substrate and its prenylated reaction products. *J Biol Chem*.
- Kuzuyama T, Noel JP, Richard SB (2005) Structural basis for the promiscuous biosynthetic prenylation of aromatic natural products. *Nature* 435: 983-987.
- Ozaki T, Mishima S, Nishiyama M, Kuzuyama T (2009) NovQ is a prenyltransferase capable of catalyzing the addition of a dimethylallyl group to both phenylpropanoids and flavonoids. *J Antibiot (Tokyo)* 62: 385-392.
- Seeger K, Flinspach K, Haug-Schifferdecker E, Kulik A, Gust B, et al. (2011) The biosynthetic genes for prenylated phenazines are located at two different chromosomal loci of *Streptomyces cinnamonensis* DSM 1042. *Microb Biotechnol* 4: 252-262.

7. Saleh O, Gust B, Boll B, Fiedler HP, Heide L (2009) Aromatic prenylation in phenazine biosynthesis: dihydrophenazine-1-carboxylate dimethylallyltransferase from *Streptomyces anulatus*. J Biol Chem 284: 14439-14447.
8. Haug-Schifferdecker E, Arican D, Brückner R, Heide L (2010) A new group of aromatic prenyltransferases in fungi, catalyzing a 2,7-dihydroxynaphthalene 3-dimethylallyltransferase reaction. J Biol Chem 285: 16487-16494.
9. Kumano T, Richard SB, Noel JP, Nishiyama M, Kuzuyama T (2008) Chemoenzymatic syntheses of prenylated aromatic small molecules using *Streptomyces* prenyltransferases with relaxed substrate specificities. Bioorg Med Chem 16: 8117-8126.
10. Steffan N, Grundmann A, Yin WB, Kremer A, Li SM (2009) Indole prenyltransferases from fungi: a new enzyme group with high potential for the production of prenylated indole derivatives. Curr Med Chem 16: 218-231.
11. Markert A, Steffan N, Ploss K, Hellwig S, Steiner U, et al. (2008) Biosynthesis and accumulation of ergoline alkaloids in a mutualistic association between *Ipomoea asarifolia* (Convolvulaceae) and a Clavicipitalean Fungus. Plant Physiol 147: 296-305.
12. Wang J, Machado C, Panaccione DG, Tsai HF, Schardl CL (2004) The determinant step in ergot alkaloid biosynthesis by an endophyte of perennial ryegrass. Fungal Genet Biol 41: 189-198.
13. Unsöld IA, Li SM (2006) Reverse prenyltransferase in the biosynthesis of fumigaclavine C in *Aspergillus fumigatus*: gene expression, purification, and characterization of fumigaclavine C synthase FGAPT1. ChemBiochem 7: 158-164.
14. Metzger U, Schall C, Zocher G, Unsöld I, Stec E, et al. (2009) The structure of dimethylallyl tryptophan synthase reveals a common architecture of aromatic prenyltransferases in fungi and bacteria. Proc Natl Acad Sci U S A 106: 14309-14314.
15. Jost M, Zocher G, Tarcz S, Matuschek M, Xie X, et al. (2010) Structure-function analysis of an enzymatic prenyl transfer reaction identifies a reaction chamber with modifiable specificity. J Am Chem Soc 132: 17849-17858.
16. Grundmann A, Kuznetsova T, Afiyatulloev SS, Li S-M (2008) FtmPT2, an *N*-prenyltransferase from *Aspergillus fumigatus*, catalyses the last step in the biosynthesis of Fumitremorgin B. ChemBiochem 9: 2059-2063.
17. Yin WB, Ruan HL, Westrich L, Grundmann A, Li S-M (2007) CdpNPT, an *N*-Prenyltransferase from *Aspergillus fumigatus*: Overproduction, Purification and Biochemical Characterisation. ChemBiochem 8: 1154-1161.
18. Yin WB, Grundmann A, Cheng J, Li SM (2009) Acetylaszonalenin biosynthesis in *Neosartorya fischeri*. Identification of the biosynthetic gene cluster by genomic mining and functional proof of the genes by biochemical investigation. J Biol Chem 284: 100-109.
19. Kremer A, Westrich L, Li SM (2007) A 7-dimethylallyltryptophan synthase from *Aspergillus fumigatus*: overproduction, purification and biochemical characterization. Microbiology 153: 3409-3416.
20. Schneider P, Weber M, Hoffmeister D (2008) The *Aspergillus nidulans* enzyme TdiB catalyzes prenyltransfer to the precursor of bioactive asterriquinones. Fungal Genet Biol 45: 302-309.
21. Ding Y, Williams RM, Sherman DH (2008) Molecular analysis of a 4-dimethylallyltryptophan synthase from *Malbranchea aurantiaca*. J Biol Chem 283: 16068-16076.
22. Ding Y, de Wet JR, Cavalcoli J, Li S, Greshock TJ, et al. (2010) Genome-based characterization of two prenylation steps in the assembly of the stephacidin and notoamide anticancer agents in a marine-derived *Aspergillus* sp. J Am Chem Soc 132:

12733-12740.

23. Liu X, Walsh CT (2009) Characterization of cyclo-acetoacetyl-L-tryptophan dimethylallyltransferase in cyclopiazonic acid biosynthesis: substrate promiscuity and site directed mutagenesis studies. *Biochemistry* 48: 11032-11044.
24. Sanchez JF, Entwistle R, Hung JH, Yaegashi J, Jain S, et al. (2011) Genome-based deletion analysis reveals the prenyl xanthone biosynthesis pathway in *Aspergillus nidulans*. *J Am Chem Soc*.
25. Zou HX, Xie X, Zheng XD, Li SM (2010) The tyrosine *O*-prenyltransferase SirD catalyzes *O*-, *N*-, and *C*-prenylations. *Appl Microbiol Biotechnol* 89: 1443-1451.
26. Chooi YH, Cacho R, Tang Y (2010) Identification of the viridicatumtoxin and griseofulvin gene clusters from *Penicillium aethiopicum*. *Chem Biol* 17: 483-494.
27. Takahashi S, Takagi H, Toyoda A, Uramoto M, Nogawa T, et al. (2010) Biochemical characterization of a novel indole prenyltransferase from *Streptomyces* sp. SN-593. *J Bacteriol* 192: 2839-2851.
28. Schultz AW, Oh DC, Carney JR, Williamson RT, Udvary DW, et al. (2008) Biosynthesis and structures of cyclomarins and cyclomarazines, prenylated cyclic peptides of marine actinobacterial origin. *J Am Chem Soc* 130: 4507-4516.
29. Edwards DJ, Gerwick WH (2004) Lyngbyatoxin biosynthesis: sequence of biosynthetic gene cluster and identification of a novel aromatic prenyltransferase. *J Am Chem Soc* 126: 11432-11433.
30. Melzer M, Heide L (1994) Characterization of polyprenyldiphosphate: 4-hydroxybenzoate polyprenyltransferase from *Escherichia coli*. *Biochim Biophys Acta* 1212: 93-102.
31. Suvarna K, Stevenson D, Meganathan R, Hudspeth ME (1998) Menaquinone (vitamin K2) biosynthesis: localization and characterization of the *menA* gene from *Escherichia coli*. *J Bacteriol* 180: 2782-2787.
32. Savidge B, Weiss JD, Wong YH, Lassner MW, Mitsky TA, et al. (2002) Isolation and characterization of homogentisate phytyltransferase genes from *Synechocystis* sp. PCC 6803 and *Arabidopsis*. *Plant Physiol* 129: 321-332.
